# Supplementary material for: Effective Zearalenone Degradation in Model Solutions and Infected Wheat Grain Using a Novel Heterologous Lactonohydrolase Secreted by Recombinant Penicillium canescens
Source: MDPI journal article supplement (doi:10.3390/toxins12080475), 2020-07-25
Supplement: s1 [file s1]

# Supplementary Materials: Effective Zearalenone Degradation in Model Solutions and Infected Wheat Grain Using a Novel Heterologous Lactonohydrolase Secreted by Recombinant *Penicillium canescens*

Larisa Shcherbakova, Alexandra Rozhkova, Dmitrii Osipov, Ivan Zorov, Oleg Mikityuk, Natalia Statsyuk, Olga Sinitsyna, Vitaly Dzhavakhiya and Arkady Sinitsyn

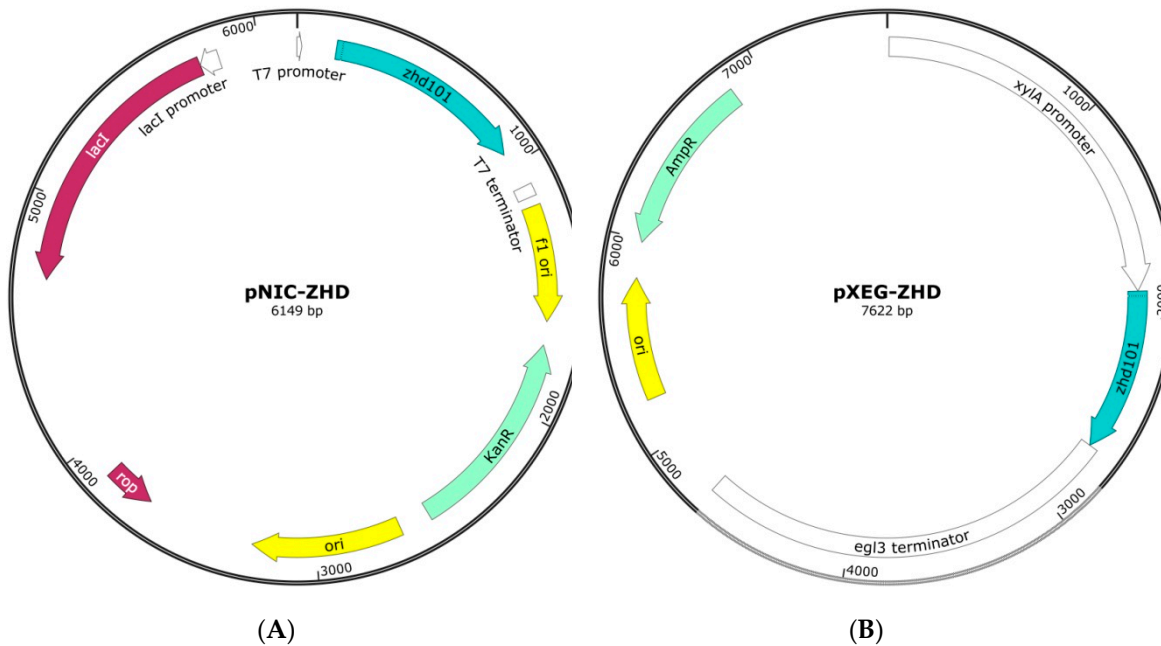

**Figure 1.** The schematic diagram of the two plasmids for expression into: *E. coli* Rosetta™ (DE3) pLysS strain (A) and *Penicillium canescens* PCA-10 (B).

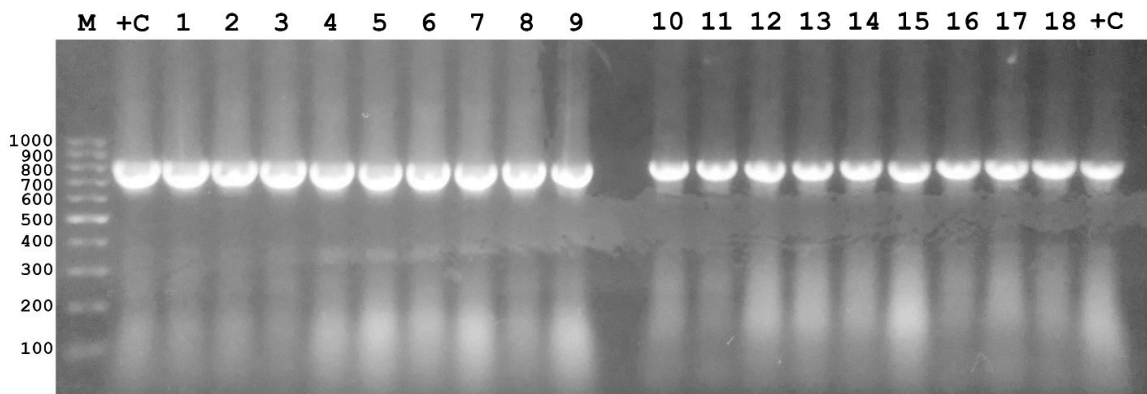

**Figure S2.** Screening of recombinant *P. canescens* ZHD strains (1–18). Screening was carried out from colonies with using Phire Hot Start II DNA Polymerase (ThermoFisher Scientific, Waltham, MA, USA). +C—positive control from plasmid pXEG-ZHD, M—DNA Ladder (ThermoFisher Scientific, Waltham, MA, USA).
